# Supplementary material for: Alloy engineering in mixed Sn–Ge perovskites for photovoltaic application
Source: Royal Society of Chemistry journal article supplement (doi:10.1039/d0ta11107d), 2021-01-01
Supplement: d0ta11107d1.pdf [file d0ta11107d1.pdf]

## Supporting Information

### Alloy Engineering in Mixed Sn-Ge Perovskites for Photovoltaic Application

Yu-Qian Zhou,<sup>†</sup> Jian Xu,<sup>†</sup> Jian-Bo Liu,<sup>\*,†</sup> and Bai-Xin Liu<sup>†</sup>

<sup>†</sup>*Key Laboratory of Advanced Materials (MOE), School of Materials Science and Engineering, Tsinghua University, Beijing 100084, China*

*\*Corresponding Author:*

*Jian-bo Liu (E-mail: jbliu@mail.tsinghua.edu.cn)*

Note 1: Computational details of effective carrier masses

Effective carrier masses  $m$  can be evaluated as

$$m = \hbar \left[ \frac{\partial^2 E(k)}{\partial^2 k} \right]^{-1}$$

where  $E(k)$  are the energy dispersion relation functions described by band structures, and  $\hbar$  is the reduced Planck constant.

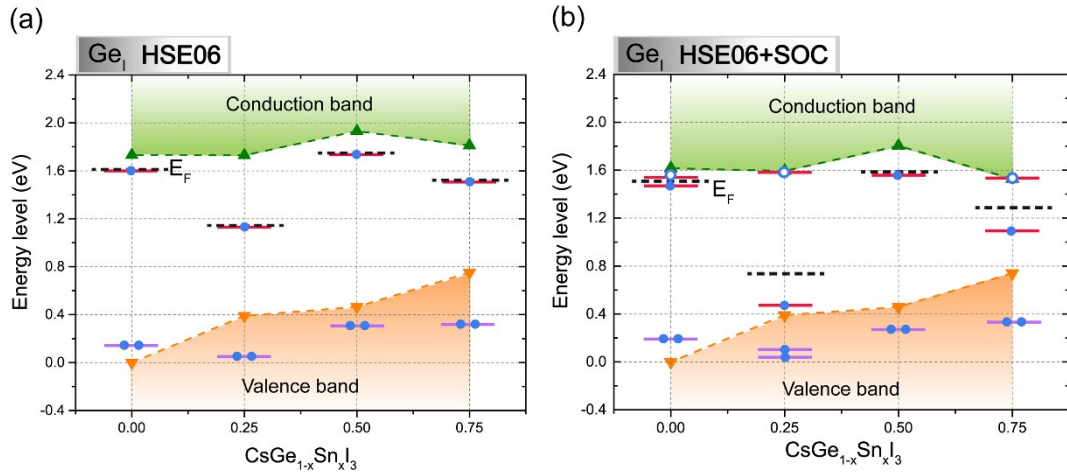

Figure S1. Schematic diagrams of the defect levels of  $\text{Ge}_I$  in  $\text{CsGe}_{1-x}\text{Sn}_x\text{I}_3$  ( $x = 0, 0.25, 0.50, 0.75$ ) by (a) the HSE06 method without SOC and (b) the HSE06 + SOC method. The 1s core level of Cs is used for alignment and the VBM of  $\text{CsGeI}_3$  is set to 0. The solid circles in blue represent electrons, while the hollow circles indicate holes. The Fermi level ( $E_F$ ) is shown as a black dotted line.

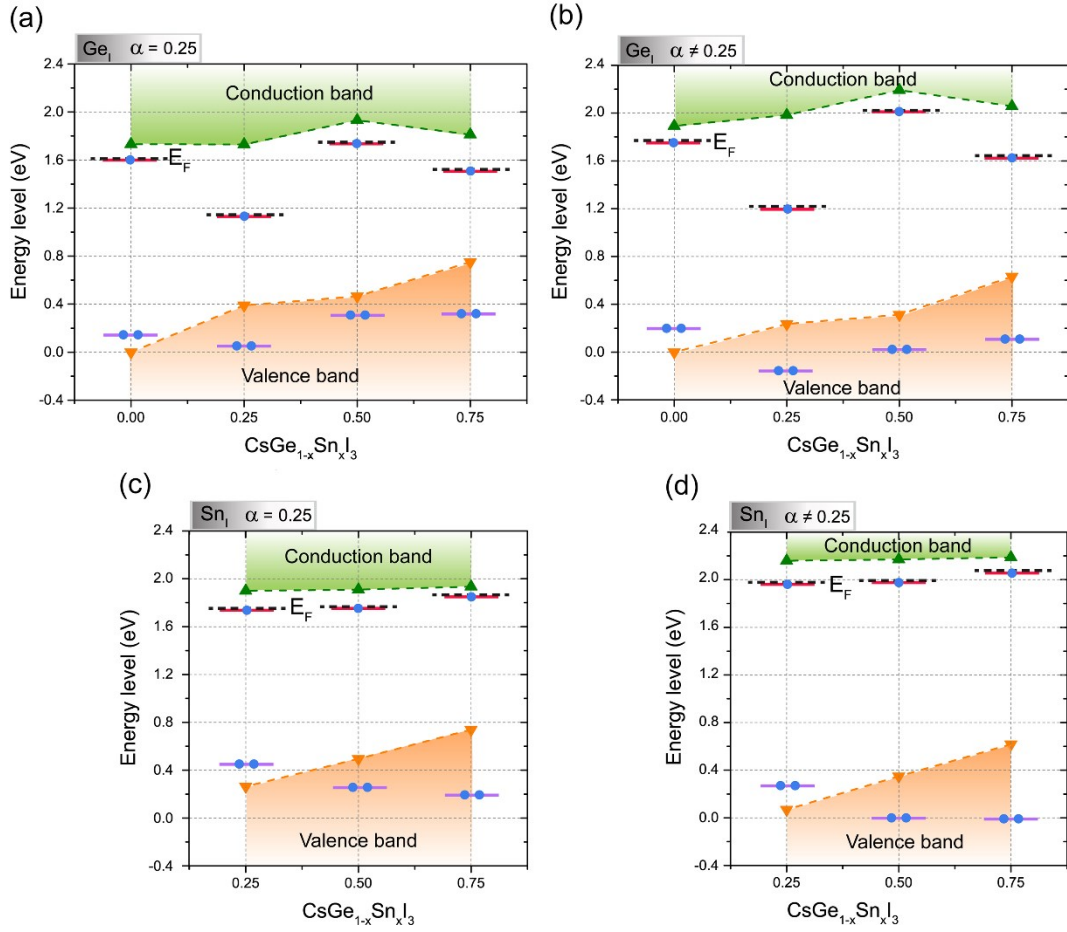

Figure S2. Schematic diagrams of the defect levels of  $\text{Ge}_I$  and  $\text{Sn}_I$  in  $\text{CsGe}_{1-x}\text{Sn}_x\text{I}_3$  ( $x = 0.25, 0.50, 0.75$ ) by the HSE method with different mixing parameter ( $\alpha$ ): (a)  $\text{Ge}_I$  with  $\alpha = 0.25$  (HSE06), (b)  $\text{Ge}_I$  with  $\alpha \neq 0.25$ , (c)  $\text{Sn}_I$  with  $\alpha = 0.25$  (HSE06), and (d)  $\text{Sn}_I$  with  $\alpha \neq 0.25$ .  $\text{CsGeI}_3$  is also shown for comparison. For HSE with  $\alpha \neq 0.25$ , the  $\alpha$  of  $\text{CsGeI}_3$  is set to 0.32 to fit the experimental bandgap of 1.6 eV<sup>1</sup>, and the  $\alpha$  of  $\text{CsGe}_{0.5}\text{Sn}_{0.5}\text{I}_3$  ( $x = 0.50$ ) is set to 0.45 to fit the experimental bandgap of 1.5 eV<sup>2</sup>. For  $\text{CsGe}_{0.75}\text{Sn}_{0.25}\text{I}_3$  ( $x = 0.25$ ) and  $\text{CsGe}_{0.25}\text{Sn}_{0.75}\text{I}_3$  ( $x = 0.75$ ), the same  $\alpha$  as  $\text{CsGe}_{0.5}\text{Sn}_{0.5}\text{I}_3$  ( $x = 0.50$ ) are used, since the experimental bandgap of them is not available yet. The 1s core level of Cs is used for alignment and the VBM of  $\text{CsGeI}_3$  is set to 0. The solid circles in blue represent electrons and the Fermi level is shown as a black dotted line.

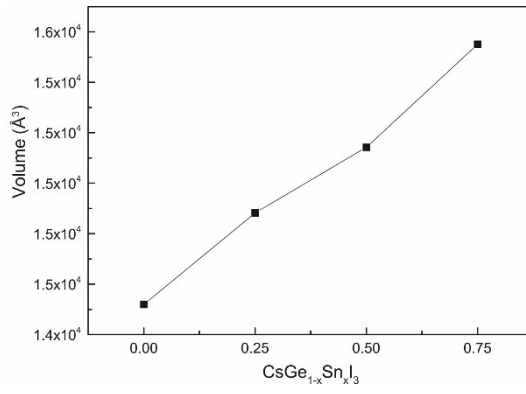

Figure S3. Volume change with Sn concentration (x) for  $\text{CsGe}_{1-x}\text{Sn}_x\text{I}_3$  ( $x = 0, 0.25, 0.5, \text{ and } 0.75$ ).

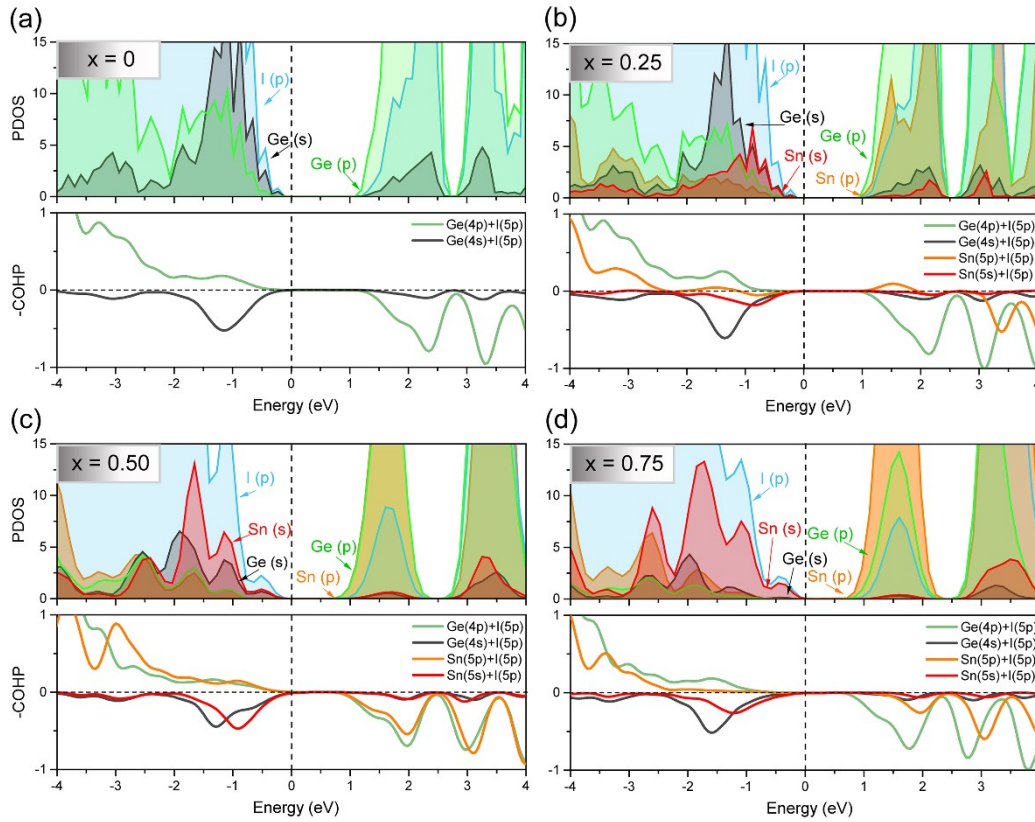

Figure S4. Orbital-projected density of states (DOS) and projected crystal orbital hamilton population (COHP) for  $\text{CsGe}_{1-x}\text{Sn}_x\text{I}_3$ : (a)  $x = 0$  ( $\text{CsGeI}_3$ ), (b)  $x = 0.25$  ( $\text{CsGe}_{0.75}\text{Sn}_{0.25}\text{I}_3$ ), (c)  $x = 0.50$  ( $\text{CsGe}_{0.5}\text{Sn}_{0.5}\text{I}_3$ ), and (d)  $x = 0.75$  ( $\text{CsGe}_{0.25}\text{Sn}_{0.75}\text{I}_3$ ). The Fermi level is set to zero.

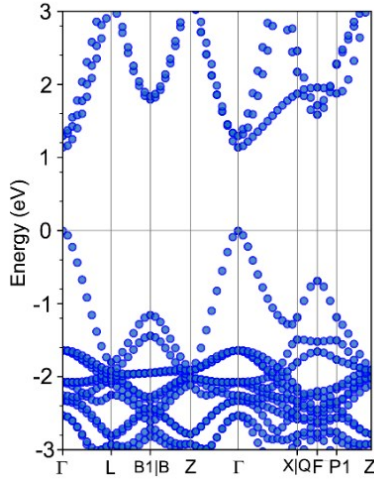

Figure S5. Unfolded band structure for  $\text{CsGe}_{0.5}\text{Sn}_{0.5}\text{I}_3$ .

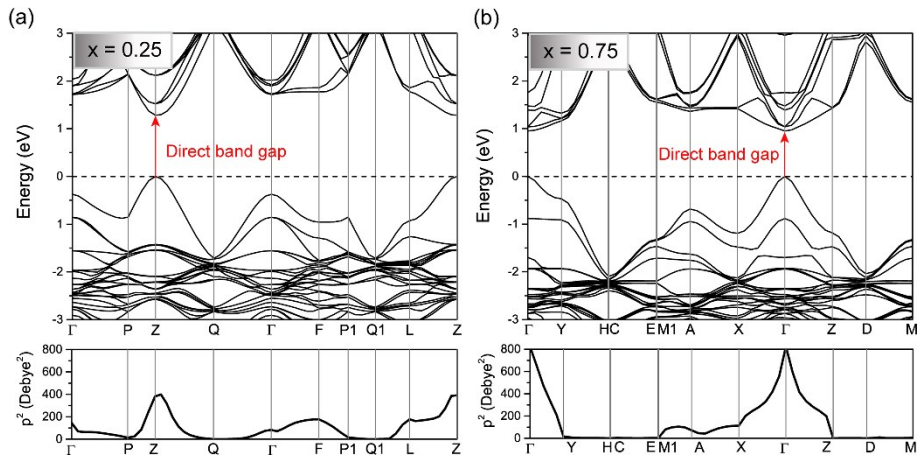

Figure S6. HSE06 calculated band structure (top panel) and optical transition dipole moment (bottom panel) for (a)  $\text{CsGe}_{0.75}\text{Sn}_{0.25}\text{I}_3$  ( $x = 0.25$ ) and (b)  $\text{CsGe}_{0.25}\text{Sn}_{0.75}\text{I}_3$  ( $x = 0.75$ ).

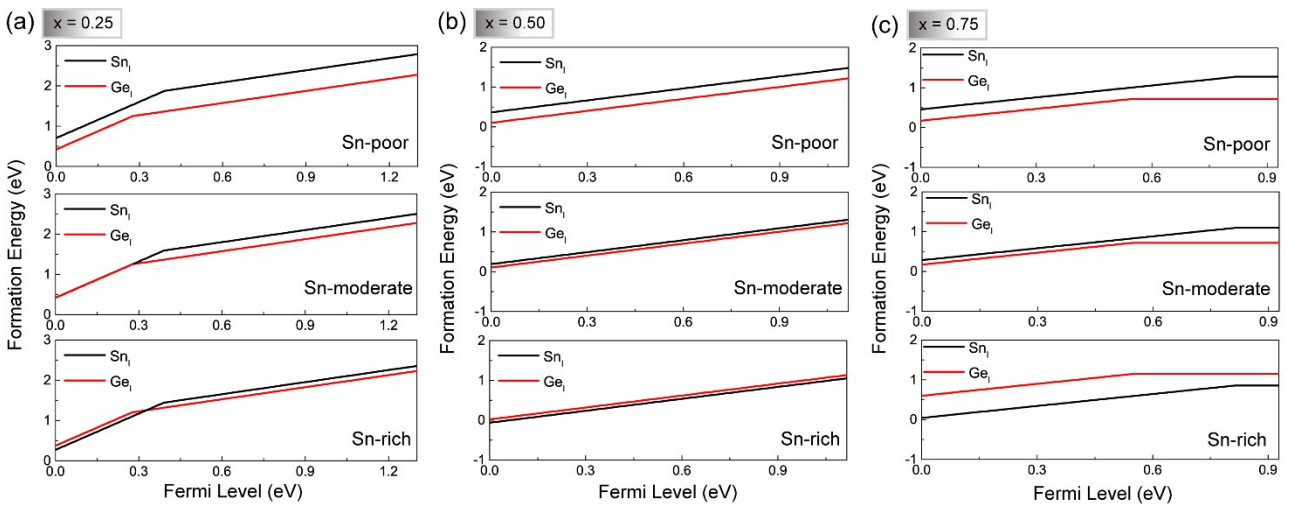

Figure S7. Calculated formation energies of  $\text{Ge}_I$  and  $\text{Sn}_I$  defects with different charge states  $q$  in  $\text{CsGe}_{1-x}\text{Sn}_x\text{I}_3$  as a function of the Fermi level: (a)  $x = 0.25$ , (b)  $x = 0.5$ , and (c)  $x = 0.75$ . The slope of the line segments indicates the defect charge states, and the kinks denote the transition energy levels. The Fermi

level is referenced to the host VBM.

Note 2: Computational details of defect formation energies

The formation energy  $E^f[X^q]$  of defect  $X$  in charge state  $q$  as a function of the Fermi level  $E_F$  can be evaluated as<sup>3</sup>

$$E^f[X^q] = E_{\text{tot}}[X^q] - E_{\text{tot}}[P] + \sum_i n_i \mu_i + q(\varepsilon_{\text{VBM}} + E_F) + E_{\text{align}}[X^q] \quad (1)$$

where  $E_{\text{tot}}[X^q]$  and  $E_{\text{tot}}[P]$  are the total energy for defective supercells and the corresponding perfect crystal, respectively. The number of atoms of type  $i$  that have been added to ( $n_i < 0$ ) or removed from ( $n_i > 0$ ) the supercell is indicated by  $n_i$ .  $\mu_i$  is the corresponding chemical potential.  $\varepsilon_{\text{VBM}}$  is the eigenvalue of valence-band maximum (VBM) in the perfect crystal and  $E_F$  is the Fermi level that refers to the VBM.  $E_{\text{align}}[X^q]$  (i.e.,  $q\Delta V$ ) is a correction term for potential-alignment to correct the finite-size effects in charged systems.<sup>4, 5</sup> The CTLs  $\varepsilon(q_1/q_2)$  are defined as the Fermi-level positions at which the formation energy of charge states  $q_1$  is equal to that of  $q_2$ :<sup>6, 7</sup>

$$\varepsilon(q_1/q_2) = \frac{(E_{\text{tot}}[X^{q_1}] + E_{\text{align}}[X^{q_1}]) - (E_{\text{tot}}[X^{q_2}] + E_{\text{align}}[X^{q_2}])}{(q_2 - q_1)} - \varepsilon_{\text{VBM}} \quad (2)$$

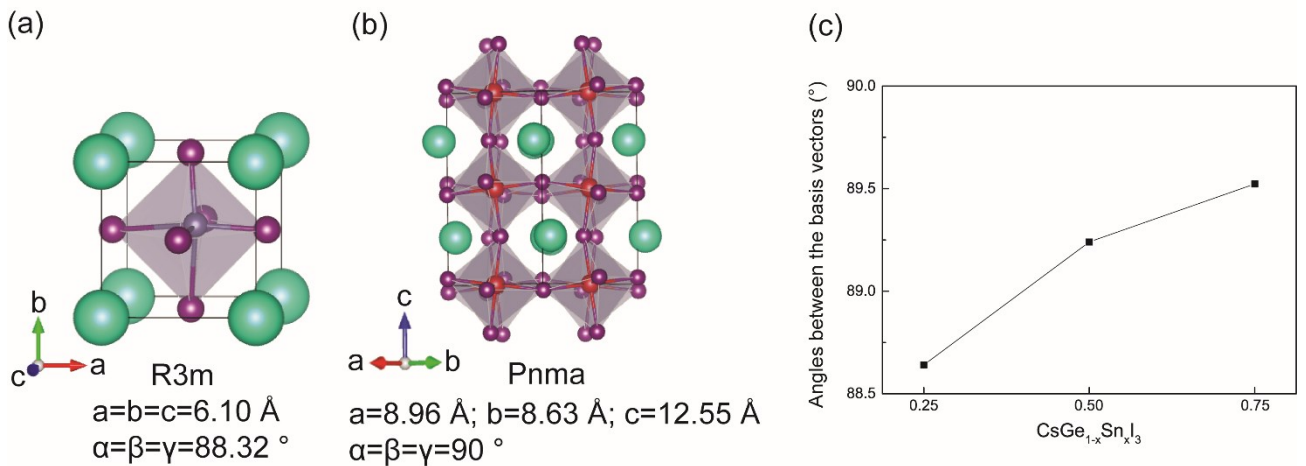

Figure S8. Crystal structures of (a)  $\text{CsGeI}_3$  and (b)  $\text{CsSnI}_3$ . Green, gray, red, and purple balls indicate Cs, Ge, Sn, and I atoms, respectively. (c) The angles between the basis vectors of  $\text{CsGe}_{1-x}\text{Sn}_x\text{I}_3$  alloys. For  $x = 0.75$ , the average bond angle is shown.

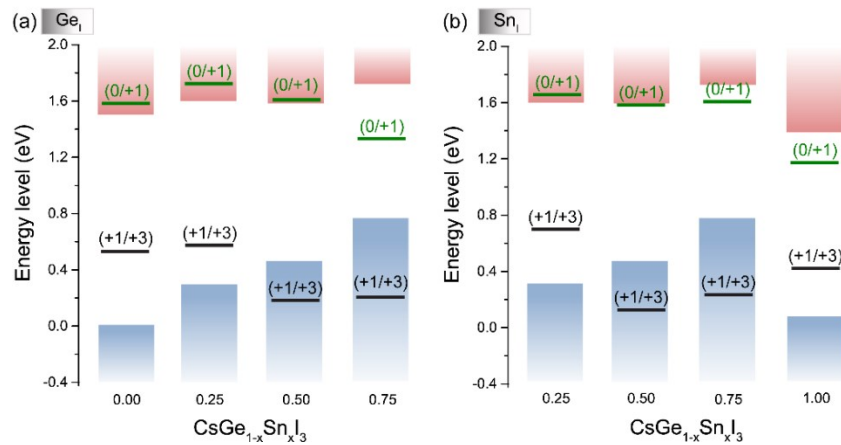

Figure S9. Calculated transition energy levels for (a)  $\text{Ge}_I$  and (b)  $\text{Sn}_I$  in  $\text{CsGe}_{1-x}\text{Sn}_x\text{I}_3$  ( $x = 0.25, 0.50,$  and  $0.75$ ).  $\text{CsGeI}_3$  and  $\text{CsSnI}_3$  (space group  $\text{Pnma}$ ) are also shown for comparison. The  $1s$  core level of  $\text{Cs}$  is used for alignment and the VBM of  $\text{CsGeI}_3$  is set to 0.

### References:

1. C. C. Stoumpos, L. Frazer, D. J. Clark, Y. S. Kim, S. H. Rhim, A. J. Freeman, J. B. Ketterson, J. I. Jang and M. G. Kanatzidis, *J. Am. Chem. Soc.*, 2015, **137**, 6804-6819.
2. M. Chen, M.-G. Ju, H. F. Garces, A. D. Carl, L. K. Ono, Z. Hawash, Y. Zhang, T. Shen, Y. Qi, R. L. Grimm, D. Pacifici, X. C. Zeng, Y. Zhou and N. P. Padture, *Nat. Commun.*, 2019, **10**, 16.
3. C. Freysoldt, B. Grabowski, T. Hickel, J. Neugebauer, G. Kresse, A. Janotti and C. G. Van de Walle, *Rev. Mod. Phys.*, 2014, **86**, 253-305.
4. T. Mattila and A. Zunger, *Phys. Rev. B*, 1998, **58**, 1367-1373.
5. S. Lany and A. Zunger, *Modell. Simul. Mater. Sci. Eng.*, 2009, **17**, 084002.
6. G. Y. Yonggang, X. Zhang and A. Zunger, *Phys. Rev. B*, 2017, **95**, 085201.
7. C. Freysoldt, B. Lange, J. Neugebauer, Q. Yan, J. L. Lyons, A. Janotti and C. G. Van de Walle, *Phys. Rev. B*, 2016, **93**, 165206.
